# Supplementary material for: Insulin resistance is related to cognitive decline but not change in CSF biomarkers of Alzheimer's disease in non‐demented adults
Source: PubMed Central journal article supplement — Alzheimers Dement (Amst). 2021 Jul 28;13(1):e12220. doi: 10.1002/dad2.12220 (PMC8319658; doi:10.1002/dad2.12220), 2021-07-28
Supplement: DAD2-13-e12220-s002.pdf [file DAD2-13-e12220-s002.pdf]

Supplementary figure 1. Flow diagram describing participant selection for three studies: CSF biomarker,  $\beta$ -amyloid chronicity, and cognitive.

Supplementary figure 1.

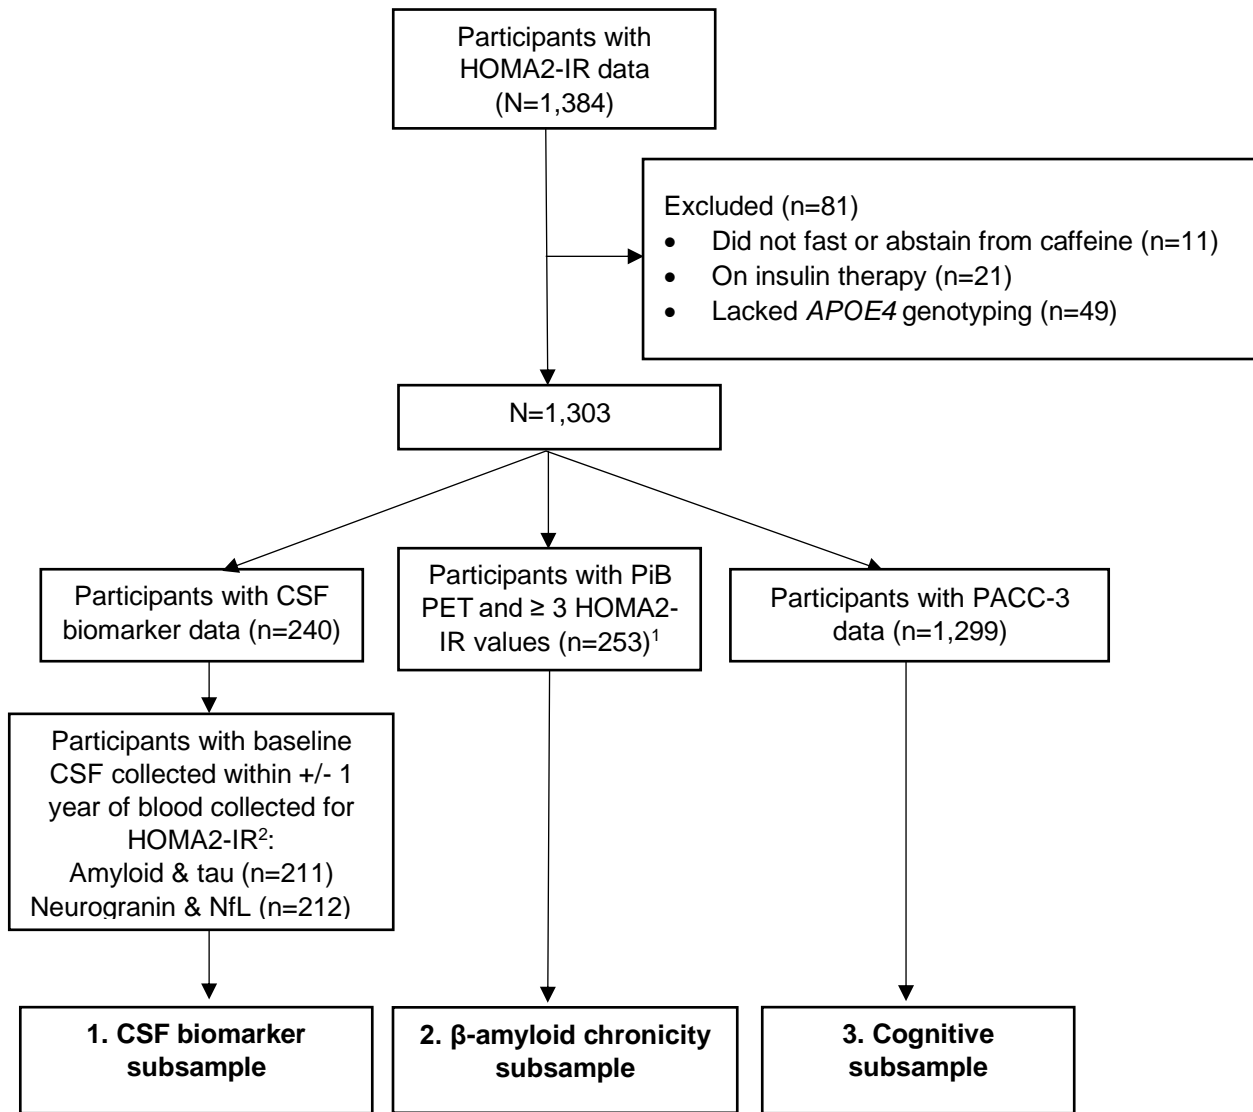

<sup>1</sup>n=17 participants with PiB PET were excluded because they lacked ≥ 3 HOMA2-IR values.

<sup>2</sup>n=28 participants were excluded because baseline CSF was collected > +/- 1 year of HOMA2-IR.

Notes: HOMA2-IR = homeostatic model assessment of insulin resistance; PACC-3 = Preclinical Alzheimer's Cognitive Composite (3-test version); PiB PET = Pittsburgh Compound B positron emission tomography.
